# Supplementary material for: Design and analysis of a six-wheeled companion robot with mechanical obstacle-overcoming adaptivity
Source: Copernicus journal article supplement (doi:10.5194/ms-12-1115-2021), 2021-12-23
Supplement: Supplementary file 1 [file ms-12-1115-2021-supplement.zip]

Archive with 2 entries (2 files):
- ms-12-1115-2021-supplement-title-page.pdf
- ZhenLuoWei_MS_2021_98_supplementary video.mp4
