# Supplementary material for: Design and analysis of a six-wheeled companion robot with mechanical obstacle-overcoming adaptivity
Source: Copernicus journal article supplement (doi:10.5194/ms-12-1115-2021), 2021-12-23
Supplement: Supplementary file 1 [file ms-12-1115-2021-supplement.zip › ms-12-1115-2021-supplement-title-page.pdf]

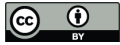

## *Supplement of*

# **Design and analysis of a six-wheeled companion robot with mechanical obstacle-overcoming adaptivity**

**Zhen Song et al.**

*Correspondence to:* Zirong Luo (luozirong@nudt.edu.cn) and Guowu Wei (g.wei@salford.ac.uk)

- ms-12-1115-2021-supplement-title-page.pdf
- ZhenLuoWei\_MS\_2021\_98\_supplementary video.mp4

The copyright of individual parts of the supplement might differ from the article licence.
